# Supplementary material
Source: PubMed Central journal article supplement (PMC1965452)
Supplement: biophysj_107.109132_1.pdf [file biophysj_107.109132_1.pdf]

# SUPPLEMENTAL MATERIAL

## 1. Sequestration Model Used for Calculation of Figs. 2 and 3

The sequestration model which is depicted in Fig. 1D includes the previously described standard MAPK model ('basic model') [1], and additionally takes Mek sequestration by un-/monophosphorylated Erk into account. The impact of such Mek sequestration was investigated by altering the sequestration factor S, which enters the association rates of the Mek sequestration complexes (Mek~Erk, Mek~pErk, pMek~Erk and pMek~pErk). The sequestration factor was set to S = 0 in Fig. 2A (black line) in order to simulate the behaviour of the basic model devoid of Mek sequestration. S was set to unity in Figs. 2A (grey line), 2B and 3 in order to take Mek sequestration into account.

### i) Differential Equations

$$pRaf\_Mek' = kon\_Raf\_Mek * (Mektot - pRaf\_Mek - pMek - pRaf\_pMek - ppMek - Mek\_Erk - pMek\_Erk - ppMek\_Erk - ppMek\_pErk - Mek\_pErk - pMek\_pErk) * (pRaftot - pRaf\_Mek - pRaf\_pMek) - koff\_Raf\_Mek * pRaf\_Mek - kcat\_Raf\_Mek * pRaf\_Mek$$

$$pMek' = kcat\_Raf\_Mek * pRaf\_Mek - kon\_Raf\_Mek * pMek * (pRaftot - pRaf\_Mek - pRaf\_pMek) + koff\_Raf\_Mek * pRaf\_pMek + (Vmax\_PPase\_Mek * ppMek / (KM\_PPase\_Mek + ppMek)) - (Vmax\_PPase\_Mek * pMek / (KM\_PPase\_Mek + pMek)) - kon\_Mek\_Erk * S * pMek * (Erktot - Mek\_Erk - pMek\_Erk - ppMek\_Erk - pErk - ppMek\_pErk - ppErk - Mek\_pErk - pMek\_pErk) + koff\_Mek\_Erk * pMek\_Erk - kon\_Mek\_Erk * S * pMek * pErk + koff\_Mek\_Erk * pMek\_pErk$$

$$pRaf\_pMek' = kon\_Raf\_Mek * pMek * (pRaftot - pRaf\_Mek - pRaf\_pMek) - koff\_Raf\_Mek * pRaf\_pMek - kcat\_Raf\_Mek * pRaf\_pMek$$

$$ppMek' = kcat\_Raf\_Mek * pRaf\_pMek - (Vmax\_PPase\_Mek * ppMek / (KM\_PPase\_Mek + ppMek)) - kon\_Mek\_Erk * ppMek * (Erktot - Mek\_Erk - pMek\_Erk - ppMek\_Erk - pErk - ppMek\_pErk - ppErk - Mek\_pErk - pMek\_pErk) + koff\_Mek\_Erk * ppMek\_Erk + kcat\_Mek\_Erk * ppMek\_Erk - kon\_Mek\_Erk * ppMek * pErk + koff\_Mek\_Erk * ppMek\_pErk + kcat\_Mek\_Erk * ppMek\_pErk$$

$$ppMek\_Erk' = kon\_Mek\_Erk * ppMek * (Erktot - Mek\_Erk - pMek\_Erk - ppMek\_Erk - pErk - ppMek\_pErk - ppErk - Mek\_pErk - pMek\_pErk) - koff\_Mek\_Erk * ppMek\_Erk - kcat\_Mek\_Erk * ppMek\_Erk$$

$$pErk' = kcat\_Mek\_Erk * ppMek\_Erk - kon\_Mek\_Erk * ppMek * pErk + koff\_Mek\_Erk * ppMek\_pErk + (Vmax\_PPase\_Erk * ppErk / (KM\_PPase\_Erk + ppErk)) - (Vmax\_PPase\_Erk * pErk / (KM\_PPase\_Erk + pErk)) - kon\_Mek\_Erk * S * (Mektot - pRaf\_Mek - pMek - pRaf\_pMek - ppMek - Mek\_Erk - pMek\_Erk - ppMek\_Erk - ppMek\_pErk - Mek\_pErk - pMek\_pErk) * pErk + koff\_Mek\_Erk * Mek\_pErk - kon\_Mek\_Erk * S * pMek * pErk + koff\_Mek\_Erk * pMek\_pErk$$

$$ppMek\_pErk' = kon\_Mek\_Erk * ppMek * pErk - koff\_Mek\_Erk * ppMek\_pErk - kcat\_Mek\_Erk * ppMek\_pErk$$

$$ppErk' = kcat\_Mek\_Erk * ppMek\_pErk - (Vmax\_PPase\_Erk * ppErk / (KM\_PPase\_Erk + ppErk))$$

$$Mek\_Erk' = kon\_Mek\_Erk * S * (Mektot - pRaf\_Mek - pMek - pRaf\_pMek - ppMek - Mek\_Erk - pMek\_Erk - ppMek\_Erk - ppMek\_pErk - Mek\_pErk - pMek\_pErk) * (Erktot - Mek\_Erk - pMek\_Erk - ppMek\_Erk - pErk - ppMek\_pErk - ppErk - Mek\_pErk - pMek\_pErk) - koff\_Mek\_Erk * Mek\_Erk$$

$$pMek\_Erk' = kon\_Mek\_Erk * S * pMek * (Erktot - Mek\_Erk - pMek\_Erk - ppMek\_Erk - pErk - ppMek\_pErk - ppErk - Mek\_pErk - pMek\_pErk) - koff\_Mek\_Erk * pMek\_Erk$$

$$Mek\_pErk' = kon\_Mek\_Erk * S * (Mektot - pRaf\_Mek - pMek - pRaf\_pMek - ppMek - Mek\_Erk - pMek\_Erk - ppMek\_Erk - ppMek\_pErk - Mek\_pErk - pMek\_pErk) * pErk - koff\_Mek\_Erk * Mek\_pErk$$

$$pMek\_pErk' = kon\_Mek\_Erk * S * pMek * pErk - koff\_Mek\_Erk * pMek\_pErk$$

### ii) Mass Conservation Relationships

$$pRaf = (pRaftot - pRaf\_Mek - pRaf\_pMek)$$

$$Mek = (Mektot - pRaf\_Mek - pMek - pRaf\_pMek - ppMek - Mek\_Erk - pMek\_Erk - ppMek\_Erk - ppMek\_pErk - Mek\_pErk - pMek\_pErk)$$

$$Erk = (Erktot - Mek\_Erk - pMek\_Erk - ppMek\_Erk - pErk - ppMek\_pErk - ppErk - Mek\_pErk - pMek\_pErk)$$

### iii) Kinetic Parameters / Initial Concentrations

pRaf<sub>tot</sub>: varied for calculation of stimulus-response  
Mektot = 1 (in Fig. 2 and 3B) or Mektot varied in Fig. 3A  
Erktot = 1 (in Fig. 2 and 3B) or Erktot varied in Fig. 3A  
Vmax\_PPase\_Mek = 0.001 (in Fig. 2 and 3A) or Vmax\_PPase\_Mek varied in Fig. 3B  
Vmax\_PPase\_Erk = 0.04 (in Fig. 2 and 3A) or Vmax\_PPase\_Erk varied in Fig. 3B  
S = 0 (Fig. 2A, black line) or S = 1 (Figs. 2A (grey line), 2B and 3)

kon\_Raf\_Mek = 0.65;  
koff\_Raf\_Mek = 0.065;  
kcat\_Raf\_Mek = 0.18;  
KM\_PPase\_Mek = 0.1;  
kon\_Mek\_Erk = 0.88;  
koff\_Mek\_Erk = 0.088;  
kcat\_Mek\_Erk = 0.22;  
KM\_PPase\_Erk = 0.5;

## 2. Extended Sequestration Model Used for Calculation of Fig. 4

Figure 4 shows that significant competition between Raf and Erk for binding to Mek is required for bistability to arise from the proposed mechanism. Additionally, bistability requires that bisphosphorylated Erk hardly binds to Erk, i.e., that product inhibition does *not* occur in Mek-mediated Erk phosphorylation.

Non-competitive binding of Raf and Erk to Mek was simulated by considering ternary complexes between Raf, Mek and Erk, and Raf-mediated catalysis on these ternary complexes (see Fig. S1). More specifically, pRaf~Mek complexes with Erk (Fig. S1A), with pErk (Fig. S1B) and with ppErk (Fig. S1C) were taken into account. The association rate constants of these ternary complexes equal those of the binary Raf~Mek complexes ( $k_{on,Raf-Mek}$ ) of the Mek~Erk complexes ( $k_{on,Mek-Erk}$ ) multiplied by the competition-factor  $c$ . The degree of competition was varied by changing  $c$ . A value of  $c = 0$  means pure competitive binding, while a value of  $c = 1$  implies pure non-competitive binding. The dissociation rate constants and the catalytic rates of the ternary complexes equal those of the binary complexes ( $k_{off,Raf-Mek}$ ,  $k_{off,Mek-Erk}$  and  $k_{cat,Raf-Mek}$ ).

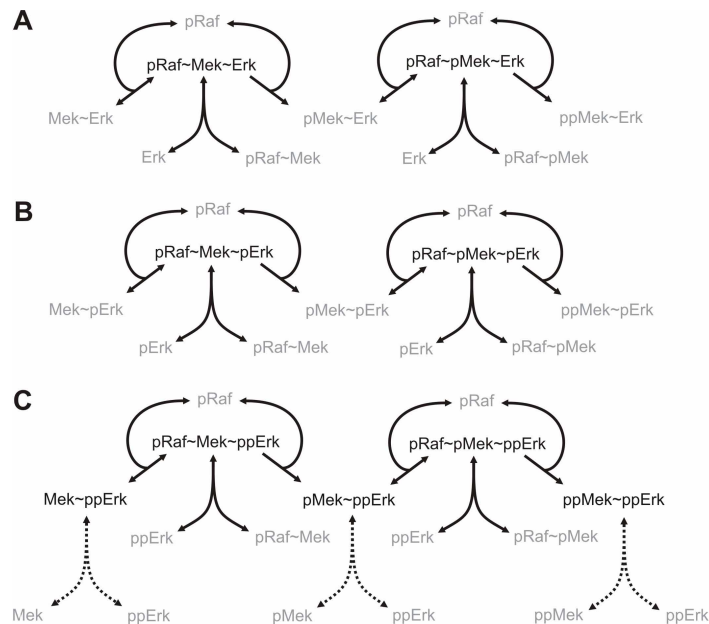

Figure S1

Product inhibition in Mek-mediated Erk phosphorylation was simulated by considering complexes of ppErk with Mek, pMek, and ppMek (see Fig. S1C). The association rates of these additional complexes equal those of the other Mek-Erk complexes ( $k_{on,Mek-Erk}$ ) multiplied by the product-inhibition-factor  $p$ . The degree of product inhibition was varied by changing  $p$ . A value of  $p = 0$  means no product inhibition, while a value of  $p = 1$  implies strong product inhibition. The dissociation rate constants of the product inhibition complexes equal those of the other Mek-Erk complexes ( $k_{off,Mek-Erk}$ ).

## i) Differential Equations

$$pRaf\_Mek' = +kon\_Raf\_Mek * (Mektot - pRaf\_Mek - pMek - pRaf\_pMek - ppMek - Mek\_Erk - pMek\_Erk - ppMek\_Erk - ppMek\_pErk - Mek\_pErk - pMek\_pErk - pRaf\_Mek\_Erk - pRaf\_pMek\_Erk - pRaf\_Mek\_pErk - pRaf\_pMek\_pErk - pRaf\_Mek\_ppErk - pRaf\_pMek\_ppErk - ppMek\_ppErk - pMek\_ppErk - Mek\_ppErk) * (pRaftot - pRaf\_Mek - pRaf\_pMek - pRaf\_Mek\_Erk - pRaf\_pMek\_Erk - pRaf\_Mek\_pErk - pRaf\_pMek\_pErk - pRaf\_Mek\_ppErk - pRaf\_pMek\_ppErk) - koff\_Raf\_Mek * pRaf\_Mek - kcat\_Raf\_Mek * pRaf\_Mek - kon\_Mek\_Erk * C * pRaf\_Mek * (Erktot - Mek\_Erk - pMek\_Erk - ppMek\_Erk - pErk - ppMek\_pErk - ppErk - Mek\_pErk - pMek\_pErk - pRaf\_Mek\_Erk - pRaf\_pMek\_Erk - pRaf\_pMek\_pErk - pRaf\_Mek\_ppErk - pRaf\_pMek\_ppErk - ppMek\_ppErk - pMek\_ppErk - Mek\_ppErk) + koff\_Mek\_Erk * pRaf\_Mek - kon\_Mek\_Erk * C * pRaf\_Mek * pErk + koff\_Mek\_Erk * pRaf\_Mek\_pErk - kon\_Mek\_Erk * C * pRaf\_Mek * ppErk + koff\_Mek\_Erk * pRaf\_Mek\_ppErk$$

$$pMek' = +kcat\_Raf\_Mek * pRaf\_Mek - kon\_Raf\_Mek * pMek * (pRaftot - pRaf\_Mek - pRaf\_pMek - pRaf\_Mek\_Erk - pRaf\_pMek\_Erk - pRaf\_Mek\_pErk - pRaf\_pMek\_pErk - pRaf\_Mek\_ppErk - pRaf\_pMek\_ppErk) + koff\_Raf\_Mek * pRaf\_pMek + (Vmax\_PPase\_Mek * ppMek / (KM\_PPase\_Mek + ppMek)) - (Vmax\_PPase\_Mek * pMek / (KM\_PPase\_Mek + pMek)) - kon\_Mek\_Erk * S * pMek * (Erktot - Mek\_Erk - pMek\_Erk - ppMek\_Erk - pErk - ppMek\_pErk - ppErk - Mek\_pErk - pMek\_pErk - pRaf\_Mek\_Erk - pRaf\_pMek\_Erk - pRaf\_pMek\_pErk - pRaf\_Mek\_ppErk - pRaf\_pMek\_ppErk - ppMek\_ppErk - pMek\_ppErk - Mek\_ppErk) + koff\_Mek\_Erk * pMek - kon\_Mek\_Erk * S * pMek * pErk + koff\_Mek\_Erk * pMek\_pErk - kon\_Mek\_Erk * P * ppErk * pMek + koff\_Mek\_Erk * pMek\_ppErk$$

$$pRaf\_pMek' = +kon\_Raf\_Mek * pMek * (pRaftot - pRaf\_Mek - pRaf\_pMek - pRaf\_Mek\_Erk - pRaf\_pMek\_Erk - pRaf\_Mek\_pErk - pRaf\_pMek\_pErk - pRaf\_Mek\_ppErk - pRaf\_pMek\_ppErk) - koff\_Raf\_Mek * pRaf\_pMek - kcat\_Raf\_Mek * pRaf\_pMek - kon\_Mek\_Erk * C * pRaf\_pMek * (Erktot - Mek\_Erk - pMek\_Erk - ppMek\_Erk - pErk - ppMek\_pErk - ppErk - Mek\_pErk - pMek\_pErk - pRaf\_Mek\_Erk - pRaf\_pMek\_Erk - pRaf\_pMek\_pErk - pRaf\_Mek\_ppErk - pRaf\_pMek\_ppErk - ppMek\_ppErk - pMek\_ppErk - Mek\_ppErk) + koff\_Mek\_Erk * pRaf\_pMek - kon\_Mek\_Erk * C * pRaf\_pMek * pErk + koff\_Mek\_Erk * pRaf\_pMek\_pErk - kon\_Mek\_Erk * C * pRaf\_pMek * ppErk + koff\_Mek\_Erk * pRaf\_pMek\_ppErk$$

$$ppMek' = +kcat\_Raf\_Mek * pRaf\_pMek - (Vmax\_PPase\_Mek * ppMek / (KM\_PPase\_Mek + ppMek)) - kon\_Mek\_Erk * ppMek * (Erktot - Mek\_Erk - pMek\_Erk - ppMek\_Erk - pErk - ppMek\_pErk - ppErk - Mek\_pErk - pMek\_pErk - pRaf\_Mek\_Erk - pRaf\_pMek\_Erk - pRaf\_pMek\_pErk - pRaf\_Mek\_ppErk - pRaf\_pMek\_ppErk - ppMek\_ppErk - pMek\_ppErk - Mek\_ppErk) + koff\_Mek\_Erk * ppMek - kcat\_Mek\_Erk * ppMek - kon\_Mek\_Erk * P * ppMek * pErk + koff\_Mek\_Erk * ppMek\_pErk + kcat\_Mek\_Erk * ppMek\_pErk - kon\_Mek\_Erk * P * ppMek * ppMek + koff\_Mek\_Erk * ppMek\_ppErk$$

$$ppMek\_Erk' = +kon\_Mek\_Erk * ppMek * (Erktot - Mek\_Erk - pMek\_Erk - ppMek\_Erk - pErk - ppMek\_pErk - ppErk - Mek\_pErk - pMek\_pErk - pRaf\_Mek\_Erk - pRaf\_pMek\_Erk - pRaf\_pMek\_pErk - pRaf\_Mek\_ppErk - pRaf\_pMek\_ppErk - ppMek\_ppErk - pMek\_ppErk - Mek\_ppErk) - koff\_Mek\_Erk * ppMek - kcat\_Mek\_Erk * ppMek - kcat\_Raf\_Mek * pRaf\_pMek - pErk$$

$$pErk' = +kcat\_Mek\_Erk * ppMek - kon\_Mek\_Erk * ppMek * pErk + koff\_Mek\_Erk * ppMek\_pErk + (Vmax\_PPase\_Erk * ppErk / (KM\_PPase\_Erk + ppErk)) - (Vmax\_PPase\_Erk * pErk / (KM\_PPase\_Erk + pErk)) - kon\_Mek\_Erk * S * (Mektot - pRaf\_Mek - pMek - pRaf\_pMek - ppMek - Mek\_Erk - pMek\_Erk - ppMek\_Erk - ppMek\_pErk - Mek\_pErk - pMek\_pErk - pRaf\_Mek\_Erk - pRaf\_pMek\_Erk - pRaf\_pMek\_pErk - pRaf\_Mek\_ppErk - pRaf\_pMek\_ppErk - ppMek\_ppErk - pMek\_ppErk - Mek\_ppErk) * pErk + koff\_Mek\_Erk * Mek\_pErk - kon\_Mek\_Erk * S * pMek * pErk + koff\_Mek\_Erk * pMek\_pErk - kon\_Mek\_Erk * C * pRaf\_Mek * pErk + koff\_Mek\_Erk * pRaf\_Mek\_pErk - kon\_Mek\_Erk * C * pRaf\_pMek * pErk + koff\_Mek\_Erk * pRaf\_pMek\_pErk$$

$$ppMek\_pErk' = +kon\_Mek\_Erk * ppMek * pErk - koff\_Mek\_Erk * ppMek\_pErk - kcat\_Mek\_Erk * ppMek\_pErk + kcat\_Raf\_Mek * pRaf\_pMek\_pErk$$

$$ppErk' = +kcat\_Mek\_Erk * ppMek\_pErk - (Vmax\_PPase\_Erk * ppErk / (KM\_PPase\_Erk + ppErk)) - kon\_Mek\_Erk * C * pRaf\_Mek * ppErk + koff\_Mek\_Erk * pRaf\_pMek\_ppErk - kon\_Mek\_Erk * P * ppErk * (Mektot - pRaf\_Mek - pMek - pRaf\_pMek - ppMek - Mek\_Erk - pMek\_Erk - ppMek\_Erk - ppMek\_pErk - Mek\_pErk - pMek\_pErk - pRaf\_Mek\_Erk - pRaf\_pMek\_Erk - pRaf\_pMek\_pErk - pRaf\_Mek\_ppErk - pRaf\_pMek\_ppErk - ppMek\_ppErk - pMek\_ppErk - Mek\_ppErk) + koff\_Mek\_Erk * Mek\_ppErk - kon\_Mek\_Erk * P * ppErk * pMek + koff\_Mek\_Erk * pMek\_ppErk - kon\_Mek\_Erk * P * ppErk * ppMek + koff\_Mek\_Erk * ppMek\_ppErk$$

$$Mek\_Erk' = +kon\_Mek\_Erk * S * (Mektot - pRaf\_Mek - pMek - pRaf\_pMek - ppMek - Mek\_Erk - pMek\_Erk - ppMek\_Erk - ppMek\_pErk - Mek\_pErk - pMek\_pErk - pRaf\_Mek\_Erk - pRaf\_pMek\_Erk - pRaf\_pMek\_pErk - pRaf\_Mek\_ppErk - pRaf\_pMek\_ppErk - ppMek\_ppErk - pMek\_ppErk - Mek\_ppErk) * (Erktot - Mek\_Erk - pMek\_Erk - ppMek\_Erk - pErk - ppMek\_pErk - ppErk - Mek\_pErk - pMek\_pErk - pRaf\_Mek\_Erk - pRaf\_pMek\_Erk - pRaf\_pMek\_pErk - pRaf\_Mek\_ppErk - pRaf\_pMek\_ppErk - ppMek\_ppErk - pMek\_ppErk - Mek\_ppErk) - koff\_Mek\_Erk * Mek\_Erk - kon\_Raf\_Mek * C * Mek\_Erk * (pRaftot - pRaf\_Mek - pRaf\_pMek - pRaf\_Mek\_Erk - pRaf\_pMek\_Erk - pRaf\_Mek\_pErk - pRaf\_pMek\_pErk - pRaf\_Mek\_ppErk - pRaf\_pMek\_ppErk - ppMek\_ppErk - pMek\_ppErk - Mek\_ppErk) + koff\_Raf\_Mek * pRaf\_Mek - pErk$$

pMek\_Erk'+kon\_Mek\_Erk\*S\*pMek\*(Erktot-Mek\_Erk-pMek\_Erk-ppMek\_Erk-pErk-ppMek\_pErk-ppErk-Mek\_pErk-pMek\_pErk-pRaf\_Mek\_Erk-pRaf\_pMek\_Erk-pRaf\_Mek\_pErk-pRaf\_pMek\_pErk-pRaf\_Mek\_ppErk-pRaf\_pMek\_ppErk-ppMek\_ppErk-pMek\_ppErk-Mek\_ppErk)-koff\_Mek\_Erk\*pMek\_Erk+kcat\_Raf\_Mek\*pRaf\_Mek\_Erk-kon\_Raf\_Mek\*C\*pMek\_Erk\*(pRaftot-pRaf\_Mek\_pRaf\_pMek-pRaf\_Mek\_Erk-pRaf\_pMek\_pErk-pRaf\_Mek\_ppErk)+koff\_Raf\_Mek\*pRaf\_pMek\_Erk

Mek\_pErk'+kon\_Mek\_Erk\*S\*(Mektot-pRaf\_Mek-pMek-pRaf\_pMek-ppMek-Mek\_Erk-pMek\_Erk-ppMek\_Erk-ppMek\_pErk-Mek\_pErk-pMek\_pErk-pRaf\_Mek\_Erk-pRaf\_pMek\_Erk-pRaf\_Mek\_pErk-pRaf\_pMek\_pErk-pRaf\_Mek\_ppErk-pRaf\_pMek\_ppErk-ppMek\_ppErk-pMek\_ppErk-Mek\_ppErk)\*pErk-koff\_Mek\_Erk\*Mek\_pErk-kon\_Raf\_Mek\*C\*Mek\_pErk\*(pRaftot-pRaf\_Mek-pRaf\_pMek-pRaf\_Mek\_Erk-pRaf\_pMek\_pErk-pRaf\_Mek\_ppErk)+koff\_Raf\_Mek\*pRaf\_Mek\_pErk

pMek\_pErk'+kon\_Mek\_Erk\*S\*pMek\*pErk-koff\_Mek\_Erk\*pMek\_pErk+kcat\_Raf\_Mek\*pRaf\_Mek\_pErk-kon\_Raf\_Mek\*C\*pMek\_pErk\*(pRaftot-pRaf\_Mek-pRaf\_pMek-pRaf\_Mek\_Erk-pRaf\_pMek\_pErk-pRaf\_Mek\_ppErk-pRaf\_pMek\_ppErk)+koff\_Raf\_Mek\*pRaf\_pMek\_pErk

pRaf\_Mek\_Erk'+kon\_Raf\_Mek\*C\*Mek\_Erk\*(pRaftot-pRaf\_Mek-pRaf\_pMek-pRaf\_Mek\_Erk-pRaf\_pMek\_pErk-pRaf\_Mek\_ppErk-pRaf\_pMek\_ppErk)-koff\_Raf\_Mek\*pRaf\_Mek\_Erk+kon\_Mek\_Erk\*C\*pRaf\_Mek\*(Erktot-Mek\_Erk-pMek\_Erk-ppMek\_Erk-pErk-ppMek\_pErk-ppErk-Mek\_pErk-pMek\_pErk-pRaf\_Mek\_Erk-pRaf\_pMek\_pErk-pRaf\_Mek\_ppErk-pRaf\_pMek\_ppErk-ppMek\_ppErk-Mek\_ppErk)-koff\_Mek\_Erk\*pRaf\_Mek\_Erk-kcat\_Raf\_Mek\*pRaf\_Mek\_Erk

pRaf\_pMek\_Erk'+kon\_Raf\_Mek\*C\*pMek\_Erk\*(pRaftot-pRaf\_Mek-pRaf\_pMek-pRaf\_Mek\_Erk-pRaf\_pMek\_pErk-pRaf\_pMek\_ppErk-pRaf\_pMek\_ppErk)-koff\_Raf\_Mek\*pRaf\_pMek\_Erk+kon\_Mek\_Erk\*C\*pRaf\_pMek\*(Erktot-Mek\_Erk-pMek\_Erk-ppMek\_Erk-pErk-ppMek\_pErk-ppErk-Mek\_pErk-pMek\_pErk-pRaf\_Mek\_Erk-pRaf\_pMek\_pErk-pRaf\_Mek\_ppErk-pRaf\_pMek\_ppErk-ppMek\_ppErk-Mek\_ppErk)-koff\_Mek\_Erk\*pRaf\_pMek\_Erk-kcat\_Raf\_Mek\*pRaf\_pMek\_Erk

pRaf\_Mek\_pErk'+kon\_Raf\_Mek\*C\*Mek\_pErk\*(pRaftot-pRaf\_Mek-pRaf\_pMek-pRaf\_Mek\_Erk-pRaf\_pMek\_pErk-pRaf\_pMek\_ppErk-pRaf\_pMek\_ppErk)-koff\_Raf\_Mek\*pRaf\_Mek\_pErk+kon\_Mek\_Erk\*C\*pRaf\_Mek\*pErk-koff\_Mek\_Erk\*pRaf\_Mek\_pErk-kcat\_Raf\_Mek\*pRaf\_Mek\_pErk

pRaf\_pMek\_pErk'+kon\_Raf\_Mek\*C\*pMek\_pErk\*(pRaftot-pRaf\_Mek-pRaf\_pMek-pRaf\_Mek\_Erk-pRaf\_pMek\_pErk-pRaf\_pMek\_ppErk-pRaf\_pMek\_ppErk)-koff\_Raf\_Mek\*pRaf\_pMek\_pErk+kon\_Mek\_Erk\*C\*pRaf\_pMek\*pErk-koff\_Mek\_Erk\*pRaf\_pMek\_pErk-kcat\_Raf\_Mek\*pRaf\_pMek\_pErk

pRaf\_Mek\_ppErk'+kon\_Raf\_Mek\*C\*Mek\_ppErk\*(pRaftot-pRaf\_Mek-pRaf\_pMek-pRaf\_Mek\_Erk-pRaf\_pMek\_pErk-pRaf\_pMek\_ppErk-pRaf\_pMek\_ppErk)-koff\_Raf\_Mek\*pRaf\_Mek\_ppErk+kon\_Mek\_Erk\*C\*pRaf\_Mek\*ppErk-koff\_Mek\_Erk\*pRaf\_Mek\_ppErk-kcat\_Raf\_Mek\*pRaf\_Mek\_ppErk

pRaf\_pMek\_ppErk'+kon\_Raf\_Mek\*C\*pMek\_ppErk\*(pRaftot-pRaf\_Mek-pRaf\_pMek-pRaf\_Mek\_Erk-pRaf\_pMek\_pErk-pRaf\_pMek\_ppErk-pRaf\_pMek\_ppErk)-koff\_Raf\_Mek\*pRaf\_pMek\_ppErk+kon\_Mek\_Erk\*C\*pRaf\_pMek\*ppErk-koff\_Mek\_Erk\*pRaf\_pMek\_ppErk-kcat\_Raf\_Mek\*pRaf\_pMek\_ppErk

Mek\_ppErk'=-kon\_Raf\_Mek\*C\*Mek\_ppErk\*(pRaftot-pRaf\_Mek-pRaf\_pMek-pRaf\_Mek\_Erk-pRaf\_pMek\_pErk-pRaf\_pMek\_ppErk-pRaf\_pMek\_ppErk)+koff\_Raf\_Mek\*pRaf\_Mek\_ppErk+kon\_Mek\_Erk\*P\*ppErk\*(Mektot-pRaf\_Mek-pMek-pRaf\_pMek-ppMek-Mek\_Erk-pMek\_Erk-ppMek\_Erk-ppMek\_pErk-Mek\_pErk-pMek\_pErk-pRaf\_Mek\_Erk-pRaf\_pMek\_pErk-pRaf\_Mek\_ppErk-pRaf\_pMek\_ppErk-ppMek\_ppErk-Mek\_ppErk)-koff\_Mek\_Erk\*Mek\_ppErk

pMek\_ppErk'+kcat\_Raf\_Mek\*pRaf\_Mek\_ppErk-kon\_Raf\_Mek\*C\*pMek\_ppErk\*(pRaftot-pRaf\_Mek-pRaf\_pMek-pRaf\_Mek\_Erk-pRaf\_pMek\_pErk-pRaf\_pMek\_ppErk-pRaf\_pMek\_ppErk)+koff\_Raf\_Mek\*pRaf\_pMek\_ppErk+kon\_Mek\_Erk\*P\*ppErk\*pMek-koff\_Mek\_Erk\*pMek\_ppErk

ppMek\_ppErk'+kcat\_Raf\_Mek\*pRaf\_pMek\_ppErk+kon\_Mek\_Erk\*P\*ppErk\*ppMek-koff\_Mek\_Erk\*ppMek\_ppErk

## ii) Mass Conservation Relationships

pRaf=(pRaftot-pRaf\_Mek-pRaf\_pMek-pRaf\_Mek\_Erk-pRaf\_pMek\_Erk-pRaf\_Mek\_pErk-pRaf\_pMek\_pErk-pRaf\_Mek\_ppErk-pRaf\_pMek\_ppErk)

Mek=(Mektot-pRaf\_Mek-pMek-pRaf\_pMek-ppMek-Mek\_Erk-pMek\_Erk-ppMek\_Erk-ppMek\_pErk-Mek\_pErk-pMek\_pErk-pRaf\_Mek\_Erk-pRaf\_pMek\_pErk-pRaf\_Mek\_ppErk-pRaf\_pMek\_ppErk-ppMek\_ppErk-Mek\_ppErk)

Erk=(Erktot-Mek\_Erk-pMek\_Erk-ppMek\_Erk-pErk-ppMek\_pErk-ppErk-Mek\_pErk-pMek\_pErk-pRaf\_Mek\_Erk-pRaf\_pMek\_Erk-pRaf\_Mek\_pErk-pRaf\_pMek\_ppErk-pRaf\_pMek\_ppErk-ppMek\_ppErk-Mek\_ppErk)

### iii) Kinetic Parameters / Initial Concentrations

pRaftot: varied for calculation of stimulus-response  
C (= Competition factor) varied  
P (= Product inhibition factor) varied  
S = 1 (= Sequestration factor)  
kon\_Raf\_Mek = 0.65  
koff\_Raf\_Mek = 0.065  
kcat\_Raf\_Mek = 0.18  
Vmax\_PPase\_Mek = 0.001  
KM\_PPase\_Mek = 0.1  
kon\_Mek\_Erk = 0.66  
koff\_Mek\_Erk = 0.066  
kcat\_Mek\_Erk = 0.22  
Vmax\_PPase\_Erk = 0.04  
KM\_PPase\_Erk = 0.5

### 3. Model Used for Calculation of Fig. 5

Figure 5 shows that the bistability mechanism proposed in this paper synergizes with that proposed by Markevich et al. [2], which arises from enzyme depletion effects in Erk double phosphorylation. The models used for calculation of Fig. 5 exhibit the topology depicted in Fig. 1D.

The models used for the calculation of the blue and red lines in Fig. 5 exhibit positive cooperativity in Mek-mediated Erk phosphorylation, so that the (isolated) Erk cycle exhibits weak bistability [3]. More specifically, it was assumed that the first and the second phosphorylation steps of ppMek-mediated Erk phosphorylation proceed with different kinetic constants. More specifically, we assume relatively high affinity (i.e., a low  $K_{M,M1}$ ), but slow catalysis (i.e., a low  $k_{cat,M1}$ ) for the first phosphorylation step. By contrast, low affinity (i.e., a high  $K_{M,M2}$ ), but very fast catalysis (i.e., a high  $k_{cat,M2}$ ) was assumed for the second phosphorylation step. No phosphorylation-site-specific kinetic differences in phosphatase-mediated Erk dephosphorylation were assumed (see maximal velocities,  $V_{m,PP1} = V_{m,PP2}$ , and Michaelis-Menten constants,  $K_{M,PP1} = K_{M,PP2}$  below), but dephosphorylation was modelled by a more complex Michaelis-Menten Mechanism, which takes enzyme depletion effects into account [2]

The blue line in Fig. 5 shows that relatively narrow range of bistability arises from the Markevich mechanism alone. In these simulations, we switched off the feedback mechanism proposed in this paper (i.e., Mek sequestration in Raf-inaccessible complexes) by abolishing the formation unproductive sequestration complexes (Mek~Erk, pMek~Erk, Mek~pErk and pMek~pErk). This was accomplished by setting  $k_{onMek-Erk} = 0$ .

The red line in Fig. 5 demonstrates that the feedback mechanism proposed in this paper brings about a broad range of bistability when combined with that proposed by Markevich et al. [2]. These simulations correspond to a system, which includes Mek sequestration into Raf-inaccessible complexes (black and grey arrows in Fig. 1D). The association rate constant of these complexes was set to the measured value  $k_{onMek-Erk} = 0.88$  (Table 1). This value implies that the affinity of the ppMek~Erk-complex, which is the enzymatic intermediate on the first Erk phosphorylation site, equals that of the unproductive sequestration complexes (Mek~Erk, pMek~Erk, Mek~pErk and pMek~pErk).

The green line in Fig. 5 shows that relatively narrow range of bistability arises from the feedback mechanism proposed in this paper. These simulations correspond to a sequestration model (black and grey arrows in Fig. 1D), where positive cooperativity and enzyme depletion effects were eliminated from the Erk cycle. This was done by assuming the same catalytic rate constant for the first and the second steps of Mek-mediated Erk phosphorylation ( $k_{catM1} = k_{catM2} = 1$ ).

## i) Differential Equations

$$pRaf\_Mek' = kon\_Raf\_Mek * (Mektot - pRaf\_Mek - pMek - pRaf\_pMek - ppMek - Mek\_Erk - pMek\_Erk - ppMek\_Erk - ppMek\_pErk - Mek\_pErk - pMek\_pErk) * (pRaftot - pRaf\_Mek - pRaf\_pMek) - koff\_Raf\_Mek * pRaf\_Mek - kcat\_Raf\_Mek * pRaf\_Mek$$

$$pMek' = kcat\_Raf\_Mek * pRaf\_Mek - kon\_Raf\_Mek * pMek * (pRaftot - pRaf\_Mek - pRaf\_pMek) + koff\_Raf\_Mek * pRaf\_pMek + (Vmax\_PPase\_Mek * ppMek / (KM\_PPase\_Mek + ppMek)) - (Vmax\_PPase\_Mek * pMek / (KM\_PPase\_Mek + pMek)) - kon\_Mek\_Erk * pMek * (Erktot - Mek\_Erk - pMek\_Erk - ppMek\_Erk - pErk - ppMek\_pErk - ppErk - Mek\_pErk - pMek\_pErk) + koff\_Mek\_Erk * pMek\_Erk - kon\_Mek\_Erk * pMek * pErk + koff\_Mek\_Erk * pMek\_pErk$$

$$pRaf\_pMek' = kon\_Raf\_Mek * pMek * (pRaftot - pRaf\_Mek - pRaf\_pMek) - koff\_Raf\_Mek * pRaf\_pMek - kcat\_Raf\_Mek * pRaf\_pMek$$

$$ppMek' = +kcat\_Raf\_Mek * pRaf\_pMek - (Vmax\_PPase\_Mek * ppMek / (KM\_PPase\_Mek + ppMek)) - ((koff\_Mek\_Erk + kcatM1) / KMM1 * ppMek * (Erktot - Mek\_Erk - pMek\_Erk - ppMek\_Erk - pErk - ppMek\_pErk - ppErk - Mek\_pErk - pMek\_pErk)) + koff\_Mek\_Erk * ppMek\_Erk + kcatM1 * ppMek\_Erk - ((koff\_Mek\_Erk + kcatM2) / KMM2 * ppMek * pErk) + koff\_Mek\_Erk * ppMek\_pErk + kcatM2 * ppMek\_pErk$$

$$ppMek\_Erk' = ((koff\_Mek\_Erk + kcatM1) / KMM1 * ppMek * (Erktot - Mek\_Erk - pMek\_Erk - ppMek\_Erk - pErk - ppMek\_pErk - ppErk - Mek\_pErk - pMek\_pErk)) - koff\_Mek\_Erk * ppMek\_Erk - kcatM1 * ppMek\_Erk$$

$$pErk' = kcatM1 * ppMek\_Erk - ((koff\_Mek\_Erk + kcatM2) / KMM2 * ppMek * pErk) + koff\_Mek\_Erk * ppMek\_pErk + (VmPP1 * ppErk / KMPP1 / (1 + ppErk / KMPP1 + pErk / KMPP2)) - (VmPP2 * pErk / KMPP2 / (1 + pErk / KMPP2 + ppErk / KMPP1)) - kon\_Mek\_Erk * (Mektot - pRaf\_Mek - pMek - pRaf\_pMek - ppMek - Mek\_Erk - pMek\_Erk - ppMek\_Erk - ppMek\_pErk - Mek\_pErk - pMek\_pErk) * pErk + koff\_Mek\_Erk * Mek\_pErk - kon\_Mek\_Erk * pMek * pErk + koff\_Mek\_Erk * pMek\_pErk$$

$$ppMek\_pErk' = ((koff\_Mek\_Erk + kcatM2) / KMM2 * ppMek * pErk) - koff\_Mek\_Erk * ppMek\_pErk - kcatM2 * ppMek\_pErk$$

$$ppErk' = +kcatM2 * ppMek\_pErk - (VmPP1 * ppErk / KMPP1 / (1 + ppErk / KMPP1 + pErk / KMPP2))$$

$$Mek\_Erk' = kon\_Mek\_Erk * (Mektot - pRaf\_Mek - pMek - pRaf\_pMek - ppMek - Mek\_Erk - pMek\_Erk - ppMek\_Erk - ppMek\_pErk - Mek\_pErk - pMek\_pErk) * (Erktot - Mek\_Erk - pMek\_Erk - ppMek\_Erk - pErk - ppMek\_pErk - ppErk - Mek\_pErk - pMek\_pErk) - koff\_Mek\_Erk * Mek\_Erk$$

$$pMek\_Erk' = kon\_Mek\_Erk * pMek * (Erktot - Mek\_Erk - pMek\_Erk - ppMek\_Erk - pErk - ppMek\_pErk - ppErk - Mek\_pErk - pMek\_pErk) - koff\_Mek\_Erk * pMek\_Erk$$

$$Mek\_pErk' = kon\_Mek\_Erk * (Mektot - pRaf\_Mek - pMek - pRaf\_pMek - ppMek - Mek\_Erk - pMek\_Erk - ppMek\_Erk - ppMek\_pErk - Mek\_pErk - pMek\_pErk) * pErk - koff\_Mek\_Erk * Mek\_pErk$$

$$pMek\_pErk' = kon\_Mek\_Erk * pMek * pErk - koff\_Mek\_Erk * pMek\_pErk$$

## ii) Mass Conservation Relationships

$$pRaf = (pRaftot - pRaf\_Mek - pRaf\_pMek)$$

$$Mek = (Mektot - pRaf\_Mek - pMek - pRaf\_pMek - ppMek - Mek\_Erk - pMek\_Erk - ppMek\_Erk - ppMek\_pErk - Mek\_pErk - pMek\_pErk)$$

$$Erk = (Erktot - Mek\_Erk - pMek\_Erk - ppMek\_Erk - pErk - ppMek\_pErk - ppErk - Mek\_pErk - pMek\_pErk)$$

## iii) Kinetic Parameters / Initial Concentrations

pRaftot: varied for calculation of stimulus-response

$$Mektot = 1$$

$$Erktot = 10$$

$$kon\_Raf\_Mek = 0.65$$

$$koff\_Raf\_Mek = 0.065$$

$$kcat\_Raf\_Mek = 0.18$$

$$Vmax\_PPase\_Mek = 0.001$$

$$KM\_PPase\_Mek = 0.01$$

$$kon\_Mek\_Erk = 0.88 \text{ (red and green lines) or } kon\_Mek\_Erk = 0 \text{ (blue line)}$$

$$koff\_Mek\_Erk = 0.1$$

$$kcatM1 = 0.2 \text{ (blue and red lines) or } kcatM1 = 1 \text{ (green line)}$$

$$KMM1 = 0.35$$

$$kcatM2 = 10 \text{ (blue and red lines) or } kcatM2 = 1 \text{ (green line)}$$

$$KMM2 = 1$$

$$VmPP1 = 0.4$$

$$VmPP2 = 0.4$$

$$KMPP1 = 0.5$$

$$KmPP2 = 0.5$$

## REFERENCES

1. Schoeberl, B., Eichler-Jonsson, C., Gilles, E. D. & Muller, G. (2002) Computational modeling of the dynamics of the MAP kinase cascade activated by surface and internalized EGF receptors, *Nat Biotechnol.* 20, 370-5.
2. Markevich, N. I., Hoek, J. B. & Kholodenko, B. N. (2004) Signaling switches and bistability arising from multisite phosphorylation in protein kinase cascades, *J Cell Biol.* 164, 353-9.
3. Ortega, F., Garces, J. L., Mas, F., Kholodenko, B. N. & Cascante, M. (2006) Bistability from double phosphorylation in signal transduction. Kinetic and structural requirements, *Febs J.* 273, 3915-26.
